# Supplementary material
Source: publisher figshare collection journal article supplement (https://karger.figshare.com/ndownloader/files/21053001)
Supplement: Supplementary file 1 [file 21053001]

Supplement Table S. ICD-10 codes, Japanese procedure codes, and claims data used to define organ failure

| Complications | ICD-10 codes | Statas |
| --- | --- | --- |
| Cardiovascular | R57 I95 | Coexisting disease at admission |
| Neurologic | G93.4 F05 | Coexisting disease at admission |
| Hematologic | D65 D69.5 D69.6 D69.8 D69.9 | Coexisting disease at admission |
| Hepatic | K72.0 K76.3 | Coexisting disease at admission |
| Renal (Renal complication at admission) | N17 | Coexisting disease at admission |
| AKI | N17 | Developed after admission |

ICD-10, International Classification of Diseases, Tenth Revision.
